# Supplementary material
Source: ML conference proceedings conference paper supplement (https://aclanthology.org/D12-1099)
Supplement: Attachment [file gs-annotator1.xlsx]

## Sheet: APT
	Housing_Type	num_bedroom	num_bathroom	size	location	neighborhood	neighborhood_amenities	parking_type	kitchen_amenities	washer_dryer_availability	floor_type	yard_patio	closet_storage_info	community_amenities	open_house_date	availability_date	condition	style	view	security_deposit	pets_allowed	others
Apartment for rent on Lacey Court	Apartment					Lacey Court
Dogs Cats Welcome Central Air Conditioning Studio	Studio																				Dogs Cats	Central Air Conditioning
Large Remodld 3 bedrm, 1+1/2 bath apartmt in a 12-unit secure building	apartmt	3	1+1/2														Remodld					12-unit:::secure:::12-unit secure building
Rent this great Apt. Home @ San Marcos Apts!	apt.																					San Marcos Apts
2 Bed 2 Bath Available For February!!!		2	2													February
nice apartment in San Pablo	apartment					San Pablo
2 Bedroom Town Home!! Only a couple left!!!	Town Home	2
2 Full Bath Large Twnhs Lndry inside unit	Twnhs		2							Lndry
2308 L Street, #4 - Terrific Rental					2308 L Street, #4
Great Value and Convenience in a Tranquil Environment
Nice Single Family House in a Good Neighborhood	House:::Single Family House
Must See Gorgeous cul-de-sac home with fruit trees	Home																					cul-de-sac
Dream Big in Your 1BR/1BA Apartment at Shadow Oaks!	Apartment	1	1																			Shadow Oaks
Apartment for Rent	Apartment
Wonderful Apartments Great Special waiting for you!	Apartments
2 bedroom 1 bathromm house	house	2	1
"+ LARGE Apt Great Downtown Location & Views/Big Balcony/Pool/Fitness"	Apt					Downtown						Big Balcony		Pool:::Fitness					Views
This Will Not Last! Cozy & Renovated Home W/ In-Unit Washer/Dryer	Home									In-unit Washer/Dryer							Renovated
Great Savings on Beautiful 2 BR Renovated Townhome	Townhome	2															Renovated
Top Flr, Corner Home! ALL NEW! Granite & SS Apps! 2 WEEKS RENT FREE!	Corner Home								Granite:::SS Apps													Corner:::2 WEEKS RENT FREE:::Top Flr
Studio Apt. inside 1906 Victorian, Available Now, Rent/Rent 2 own	Studio Apt.															now		1906 Victorian				Rent/Rent 2 own
country rental wanted						country
Two unit in Antioch						Antioch																Two unit
Single Family Home 3bdrm-1 bth lovely hdwood throughout	Single family Home	3	1								hdwood
Come Home To Avalon Dublin Station!	Home						Avalon Dublin Station
2 Beds 2 Baths Apartment in Castro Valley, CA from Townhouse Plaza Apa	Apartment	2	2		Castro Valley, CA																	Townhouse Plaza Apa
Santa Cruz, 335 Gault St #4 spacious upstairs great Seabright location					Santa Cruz, 335 Gault St #4	Seabright																upstairs:::Seabright
Executive Home with Views of the South Bay Close to Good Schools	Executive Home						Good Schools												South Bay
BEAUTIFUL/ SPACIOUS TOP FLOOR FLAT WITH GARAGE PARKING !!	Flat							GARAGE PARKING														Top Floor
Looking for a Great community? Look no futher!
2Bd/1Bath Move In Special		2	1																			Move in Special
Hillside Location Near San Francisco! Incredible Views!					Hillside Location	San Francisco													Incredible
Sunny 1BR with Den in Village		1				Den in Village																Sunny
~*~CALL SUNDANCE TODAY TO FIND OUT ABOUT YOUR NEW HOME~*~	Home
Unique Floorplan, Bottom Flr, 2Car Garg. w/Laundry Hook-ups OPEN HOUSE								2Car Garg.		Laundry Hook-ups												Bottom Flr
Lakeport Home	Home					Lakeport
Awesome Location! $1000 Off move-in costs!						Awesome																$1000 off move-in costs
Beautiful Remodeled 3 Bed 1 Bath in Gated 4-Plex Convenient Location		3	1			Convenient
Avalon at Diamond Heights, Convenience of Suburban Living
Now Leasing...Newly Remodeled 2 bedroom...Available NOW!		2														NOW	Remodeled
Penthouse Pano View Pacific Park Plaza	Penthouse
2.5BA TH Great Nbrhood/Granite Ctrs/Stream/Pools/Spa/Fitness/FREE WiFi			2.5			Great			Granite Ctrs					Stream:::Pools:::Spa:::Fitness:::FREE WiFi
Luxury Condo	Condo
Deluxe duplex	duplex
Gated Community~*~Walk to BART~*~20 Minuets to San Francisco						San Francisco	BART							Gated Community
2/1 Apartment for rent	Apartment	2	1
Beautiful Gale Ranch Detached Studio with Garage	Studio							Garage														Gale Ranch
NEW and BEAUTIFUL CONDO FOR RENT (near Great Mall)	CONDO					Great Mall
Ocean views																			Ocean
Let's go take a tour! AROUND OUR BEAUTIFUL COMMUNITY!
Apartment for rent -- utilities included!	Apartment																					utilities included
1110 Charter Lane Fairfield					1110 Charter Lane Fairfield
Special on 6 month leases! W/G/S PAID, Massive amount of storage!													Massive amount of storage									Special on 6 month leases:::W/G/S PAID
*UPGRADES* 2/2.5 Luxury Town Home Garage Private Yard	Town Home	2	2.5					Garage				Private Yard
We'll take $500.00 off your first months rent!																						$500.00 off your first months rent
Downstairs Apartment in Downtown Willow Glen	Apartment					Downtown Willow Glen																Downstairs
Cozy apartment!	Apartment
Piedmont House	House					Piedmont
Se renta HERMOSO Duplex	Duplex
1 Bedroom W/D!! In Unit		1								W/D
Walk to BART from your Luxurious New Home at The Presidio!	Home					Presidio	BART
GLENVIEW 3/BR 11/2 BT VINTAGE CRAFTSMAN CHARMER		3	11/2			GLENVIEW
Country duplex unit	duplex					Country
Newly remodeled 4 beds/3 baths single family house in Antioch	single family house	4	3			Antioch											newly remodeled
New Home! $250 SD Moves You In! (OAC) CALL NOW....	Home
1 1/2 Bath Townhouse Apt. Great Location, Maple/Granite Kitchen!!!	Townhouse Apt.		1 1/2			Great location			Maple:::Granite
Magnificent apartment home in prime area!	apartment					prime area
Centrally Located						Centrally located
Spacious JR 1x1		1	1
Beautiful 2 bedroom garden level apartment.	apartment	2																				garden level
Furnished on Beach Hill						Beach Hill																Furnished
SFR Cute 2bdr/2ba in Madrone Canyon		2	2			Madrone Canyon:::SFR
Beautiful Two Bedroom Near Transportation!		Two					transportation
Condo in Oakland Chinatown/Downtown	Condo					Oakland Chinatown/Downtown
3Bedroom single house for rent	house	3
Se renta apartamento* Garage	apartamento													Garage
Excellent home with nice bedrooms	home
Una ubicación estupenda, brillante de 3 unidades de un dormitorio! **	dormitorio
SPACIOUS ONE BEDROOM IN DOWNTOWN PALO ALTO! HARDWOOD FLOORS!		one				DOWNTOWN PALO ALTO					HARDWOOD
2 bdrm townhouse	townhouse	2
PENDING! Downtown Condo in Secured Building, Hardwood Floors! --PRANDI	condo					Downtown					Hardwood											secured building
ALMADEN TOWNHOUSE WITH 2 MASTER SUITES	TOWNHOUSE	2				Almaden																2 master suites
Spacious 2 BR near Stanford University		2				Stanford University
3.5ba - COMPASS PROPERTY - Spacious condo near Alma Street.	condo		3.5			Alma Street																compass property
SIDE-BY-SIDE DUPLEX UNIT - YOU WON'T BE DISAPPOINTED!!!	Duplex
Rustic Ranch Cabin	Cabin
Offering Unbeatable Specials! This Week ONLY! Central AC! End Unit!																						Central AC:::End Unit
JR/One Bed. High Ceilings. New paint. New Carpet. Gated Property.	JR	1												Gated Property								High Ceilings:::New paint:::New carpet
2725 Haste,OPEN HOUSE,1/1,Super Clean, Walk to UCB		1	1		2725 Haste		UCB								1/1
Furnished 2br condo,nr BART, Concord, short/long term OK, pool,parking	condo	2				Concord	nr BART	Parking						pool								Furnished:::short/long term OK
Garage, Laundry...								Garage		laundry
Cute Cottage 3bdrm/Newly remodeled	Cottage	3															Newly remodeled
Fall In Love with the Tranquil Setting of CW in this 1x1 and Save $500		1	1
DOWNSTAIRS, LARGE ENCLOSED PATIO, HUGE BEDROOM, W/D INSIDE!!		1								W/D INSIDE		enclosed PATIO										DOWNSTAIRS
Unique 1 Bed 1 Bath with Loft. Plenty of Natural Light	Loft	1	1																			Plenty of Natural Light
Immediate move -in!																Immediate
***Spacious & Comfortable 1Bdr, Great Location,Move-In This Weekend!!*		1				Great Location										This Weekend
cute single family home in San Ramon for Rent	single family home					San Ramon
WALK TO TOWN! ALMOND/SHUEY DISTRICT. UPGRADED & MORE						ALMOND/SHUEY DISTRICT	TOWN										UPGRADED
Remodeled Craftsman																	Remodeled
