# Supplementary material
Source: ML conference proceedings conference paper supplement (https://aclanthology.org/D12-1099)
Supplement: Attachment [file gs-annotator2.xlsx]

## Sheet: APT
	Housing_Type	num_bedroom	num_bathroom	size	location	neighborhood	neighborhood_amenities	parking_type	kitchen_amenities	washer_dryer_availability	floor_type	yard_patio	closet_storage_info	community_amenities	open_house_date	availability_date	condition	style	view	security_deposit	pets_allowed	others
Apartment for rent on Lacey Court	Apartment				Lacey Court
Dogs Cats Welcome Central Air Conditioning Studio	Studio																				Dogs Cats Welcome	Central Air Conditioning
Large Remodld 3 bedrm, 1+1/2 bath apartmt in a 12-unit secure building	apartmt	3	1+1/2														Remodld
Rent this great Apt. Home @ San Marcos Apts!	Apt. Home
2 Bed 2 Bath Available For February!!!		2	2													Available For February
nice apartment in San Pablo	apartment				San Pablo												nice
2 Bedroom Town Home!! Only a couple left!!!	Town Home	2
2 Full Bath Large Twnhs Lndry inside unit	Twnhs		2							Lndry inside unit
2308 L Street, #4 - Terrific Rental					2308 L Street, #4
Great Value and Convenience in a Tranquil Environment
Nice Single Family House in a Good Neighborhood	Single Family House
Must See Gorgeous cul-de-sac home with fruit trees	cul-de-sac home
Dream Big in Your 1BR/1BA Apartment at Shadow Oaks!	Apartment	1	1		Shadow Oaks
Apartment for Rent	Apartment
Wonderful Apartments Great Special waiting for you!	Apartments
2 bedroom 1 bathromm house	house	2	1
"+ LARGE Apt Great Downtown Location & Views/Big Balcony/Pool/Fitness"Apt	Apt					Downtown Location								Big Balcony:::Pool:::Fitness					Views
This Will Not Last! Cozy & Renovated Home W/ In-Unit Washer/Dryer	Home									W/ In-Unit Washer/Dryer							renovated
Great Savings on Beautiful 2 BR Renovated Townhome	Townhome	2															renovated
Top Flr, Corner Home! ALL NEW! Granite & SS Apps! 2 WEEKS RENT FREE!	Home								Granite:::SS Apps													Top Flr:::Corner:::2 WEEKS RENT FREE
Studio Apt. inside 1906 Victorian, Available Now, Rent/Rent 2 own	Studio Apt															now		1906 victorian
country rental wanted
Two unit in Antioch	Two unit				Antioch
Single Family Home 3bdrm-1 bth lovely hdwood throughout	Single Family Home	3	1								hdwood
Come Home To Avalon Dublin Station!					Avalon Dublin Station
2 Beds 2 Baths Apartment in Castro Valley, CA from Townhouse Plaza Apa	Apartment	2	2		Castro Valley, CA																	Townhouse Plaza Apa
Santa Cruz, 335 Gault St #4 spacious upstairs great Seabright location					Santa Cruz, 335 Gault St #4	Seabright
Executive Home with Views of the South Bay Close to Good Schools	Executive Home						Good schools												South Bay
BEAUTIFUL/ SPACIOUS TOP FLOOR FLAT WITH GARAGE PARKING !!	FLAT							GARAGE PARKING														top floor
Looking for a Great community? Look no futher!
2Bd/1Bath Move In Special		2	1
Hillside Location Near San Francisco! Incredible Views!					Hillside	San Francisco
Sunny 1BR with Den in Village		1				Village
~*~CALL SUNDANCE TODAY TO FIND OUT ABOUT YOUR NEW HOME~*~
Unique Floorplan, Bottom Flr, 2Car Garg. w/Laundry Hook-ups OPEN HOUSE								2Car Garg.		w/Laundry Hook-ups												Bottom Flr
Lakeport Home	Home				Lakeport
Awesome Location! $1000 Off move-in costs!
Beautiful Remodeled 3 Bed 1 Bath in Gated 4-Plex Convenient Location	4-Plex	3	1											Gated			Beautiful Remodeled					Gated
Avalon at Diamond Heights, Convenience of Suburban Living					Diamond Heights
Now Leasing...Newly Remodeled 2 bedroom...Available NOW!		2														now	Newly remodeled
Penthouse Pano View Pacific Park Plaza	Penthouse				Pacific Park Plaza														Pano view
2.5BA TH Great Nbrhood/Granite Ctrs/Stream/Pools/Spa/Fitness/FREE WiFi	TH		2.5						Granite Ctrs					Stream:::Pools:::Spa:::Fitness:::FREE WiFi
Luxury Condo	Luxury Condo
Deluxe duplex	Deluxe duplex
Gated Community~*~Walk to BART~*~20 Minuets to San Francisco						San Francisco	BART							Gated								Gated Community
2/1 Apartment for rent	Apartment	2	1
Beautiful Gale Ranch Detached Studio with Garage	Detached Studio				Gale Ranch			Garage
NEW and BEAUTIFUL CONDO FOR RENT (near Great Mall)	CONDO						near Great Mall
Ocean views																			Ocean views
Let's go take a tour! AROUND OUR BEAUTIFUL COMMUNITY!
Apartment for rent -- utilities included!	Apartment																					utilities included
1110 Charter Lane Fairfield					1110 Charter Lane Fairfield
Special on 6 month leases! W/G/S PAID, Massive amount of storage!													Massive amount of storage									W/G/S paid
*UPGRADES* 2/2.5 Luxury Town Home Garage Private Yard	Luxury Town Home	2	2.5					Garage						Private Yard
We'll take $500.00 off your first months rent!																						$500.00 off your first months rent
Downstairs Apartment in Downtown Willow Glen	Downstairs Apartment				Willow Glen	Downtown
Cozy apartment!	apartment
Piedmont House	House				Piedmont
Se renta HERMOSO Duplex	Duplex
1 Bedroom W/D!! In Unit		1								W/D!! In Unit
Walk to BART from your Luxurious New Home at The Presidio!	Home																					The Presidio
GLENVIEW 3/BR 11/2 BT VINTAGE CRAFTSMAN CHARMER		3	2			GLENVIEW
Country duplex unit	duplex unit
Newly remodeled 4 beds/3 baths single family house in Antioch	single family house	4	3		Antioch												Newly remodeled
New Home! $250 SD Moves You In! (OAC) CALL NOW....	New Home																					$250 SD (??)
1 1/2 Bath Townhouse Apt. Great Location, Maple/Granite Kitchen!!!	Townhouse Apt.		1.5						Maple/Granite Kitchen
Magnificent apartment home in prime area!	apartment home					prime area
Centrally Located
Spacious JR 1x1		1	1
Beautiful 2 bedroom garden level apartment.	apartment	2																				garden level
Furnished on Beach Hill						Beach Hill																furnished
SFR Cute 2bdr/2ba in Madrone Canyon		2	2		Madrone Canyon	SFR
Beautiful Two Bedroom Near Transportation!		Two					transportation
Condo in Oakland Chinatown/Downtown	Condo				Oakland	Chinatown/Downtown
3Bedroom single house for rent	single house	3
Se renta apartamento* Garage	apartamento							Garage
Excellent home with nice bedrooms	home
Una ubicación estupenda, brillante de 3 unidades de un dormitorio! **	dormitorio
SPACIOUS ONE BEDROOM IN DOWNTOWN PALO ALTO! HARDWOOD FLOORS!		ONE				DOWNTOWN PALO ALTO					HARDWOOD FLOORS
2 bdrm townhouse	townhouse	2
PENDING! Downtown Condo in Secured Building, Hardwood Floors! --PRANDICondo	Condo					Downtown					Hardwood Floors											Secured Building
ALMADEN TOWNHOUSE WITH 2 MASTER SUITES	TOWNHOUSE	2			ALMADEN
Spacious 2 BR near Stanford University		2					near Stanford University
3.5ba - COMPASS PROPERTY - Spacious condo near Alma Street.	condo		3.5		near Alma Street.																	COMPASS PROPERTY
SIDE-BY-SIDE DUPLEX UNIT - YOU WON'T BE DISAPPOINTED!!!	Duplex
Rustic Ranch Cabin	Cabin
Offering Unbeatable Specials! This Week ONLY! Central AC! End Unit!																						Central AC:::end unit
JR/One Bed. High Ceilings. New paint. New Carpet. Gated Property.		ONE												Gated Property								High Ceilings:::New paint:::New Carpet
2725 Haste,OPEN HOUSE,1/1,Super Clean, Walk to UCB		1	1		2725 Haste		Walk to UCB										Super Clean
Furnished 2br condo,nr BART, Concord, short/long term OK, pool,parking	condo	2			Concord		nr BART	parking						pool								short/long term OK
Garage, Laundry...								Garage		Laundry
Cute Cottage 3bdrm/Newly remodeled	Cottage	3															Newly remodeled
Fall In Love with the Tranquil Setting of CW in this 1x1 and Save $500		1	1
DOWNSTAIRS, LARGE ENCLOSED PATIO, HUGE BEDROOM, W/D INSIDE!!										W/D INSIDE!
Unique 1 Bed 1 Bath with Loft. Plenty of Natural Light	Loft	1	1																			Plenty of Natural Light
Immediate move -in!																Immediate
***Spacious & Comfortable 1Bdr, Great Location,Move-In This Weekend!!*		1														this weekend
cute single family home in San Ramon for Rent	single family home				San Ramon
WALK TO TOWN! ALMOND/SHUEY DISTRICT. UPGRADED & MORE						ALMOND/SHUEY DISTRICT	WALK TO TOWN										upgraded
Remodeled Craftsman	Craftsman																Remodeled
