# Supplementary material
Source: ML conference proceedings conference paper supplement (https://aclanthology.org/D12-1099)
Supplement: Attachment [file gs-annotator2.xlsx]

## Sheet: GloveMitt
	Product_Type	Brand	Sport	Condition	Glove_Mitt_Size	Dexterity	Game_Position	Gender	Age_Group	Shipping_Info	Price	Series_Name	Color	Model_name	Weight	Material	Others
New Rawlings 12" PROS20BR Pro Preferred Series Glove Right Hand Throw	Glove	Rawlings		New	12"	Right Hand Throw						Pro Preferred Series		PROS20BR
Rawlings OR 520 Leather 12" Baseball Glove LH	Glove	Rawlings	Baseball		12"	LH								OR 520		Leather
New Mizuno Franchise Professional Model Baseball Glove 12" GFN1202	Glove	Mizuno Franchise	Baseball	New	12"									GFN1202
Wilson A2000 Showcase SC-B2 (11.75") - RHT		Wilson			11.75"	RHT						A2000		Showcase SC-B2
RAWLINGS 5SC130CD REVO 550 SERIES 13" UTILITY SOFTBALL GLOVE NEW WITH TAGS	GLOVE	RAWLINGS	SOFTBALL	NEW	13"							Revo 550 Series		5SC130CD
ZETT Gran Status 12" Pitcher Baseball Glove Tan RHT Ace	Glove	ZETT	Baseball		12"	RHT	Pitcher						Tan	Gran Status
New Akadema 14" ASR282 ProSoft Series Slow Pitch Glove Left Hand Throw	Glove	Akadema	Slow Pitch	NEW	14"	Left Hand Throw						ProSoft Series		ASR282
Gold Glove Gamer 12.25 inch Pro Taper Baseball Glove-Left Hand Thrower	Glove	Gold Glove	Baseball		12.25 inch	Left Hand Thrower								Gamer
Akadema 12.75 in Fast Pitch Softball Baseball Glove NEW	Glove	Akadema	Fast Pitch Softball Baseball	NEW	12.75 in
SSK Pro Baseball Elbow Guard Protective Gear Black Orange Free Ship	Elbow Guard Protective Gear	SSK	Baseball							Free Ship			Black Orange
ZETT Baseball Gloves Blue 12'' LHT {Pro Model}	Gloves	ZETT	Baseball		12"	LHT							Blue	Pro Model
New 2012 Louisville Slugger 11" 1884 Genesis Ball Glove - Right Hand Thrower	Glove	Louisville Slugger		New	11"	Right Hand Thrower								1884 Genesis
New Mizuno Fastpitch 12" Fitch Softball Glove Ball Baseball GFN 1208 Right Hand	Glove	Mizuno	Fastpitch Softball Glove Baseball	New	12"	Right Hand								GFN 1208
Wilson A2000 XLC-ST (12.5") - RHT		Wilson			12.5"	RHT						A2000		XLC-ST
WORTH LIBERTY ADVANCED CUSTOM MLB ISSUE ALEX RIOS - CHICAGO WHITE SOX GLOVE	GLOVE	WORTH LIBERTY															ADVANCED CUSTOM MLB ISSUE ALEX RIOS - CHICAGO WHITE SOX
Louisville Slugger XH1125SG TPX HD9 (11.25") - RHT		Louisville Slugger			11.25"	RHT						TPX HD9		XH1125SG
Childrens Baseball or T-Ball glove Wilson Good Condoition 3-7 year old used	glove	Wilson	Baseball:::T-Ball	Good:::used					Childrens								3-7 year old
Akadema ADT 57, 13" First base mitt, Right and left hand throw available	mitt	Akadema			13"	Right and left hand throw	First base							ADT 57
Franklin 9.5 inch Baseball Glove and Ball - Girls NEW	Glove	Franklin	Baseball	NEW	9.5 inch			Girls
Sportsmaster Baseball Glove	Glove	Sportsmaster	Baseball
New 2012 Louisville Slugger 13-Inch TPX Pro Flare Ball Glove-Right Hand Thrower	Glove	Louisville Slugger		New	13-Inch	Right Hand Thrower								TPX Pro Flare
FRANKLIN FIELD-FLEX TEEBALL TBALL 9.5" RHT GLOVE & BALL LITE TAN READY TO PLAY	GLOVE:::BALL	FRANKLIN	TEEBALL TBALL		9.5"	RHT						Field Flex	LITE TAN
WILSON A600 GLOVE (mit) right thrower - new!!!	GLOVE(mit)	WILSON		new		right thrower						A600
Rawlings gg601g gold glove pro baseball glove lefty	glove	Rawlings	baseball			lefty								gg601g gold glove pro
Wilson A2800 1613AG Pro Stock Leather 12 inch Baseball Glove Retail $219	Glove	Wilson	Baseball		12 inch						219	A2800		1613AG		Pro Stock Leather
Ektelon Classic Pro Racquetball Glove Left-Handed	Glove	Ektelon Classic	Racquetball			Left-Handed						Classic Pro
Wilson A2000 1786 DB Infield Baseball Glove 11.5" RHT Dark Brown BB1786DB	Glove	Wilson	Baseball		11.5"		Infield					A2000	Dark Brown	BB1786DB
Akadema ATM-92REG Prodigy Series 11.5 Youth Baseball Glove Right hand throw	Glove	Akadema	Baseball		11.5	Right hand throw						Prodigy Series		ATM-92REG
Wilson A0700 1782-BST 11 3/4" baseball glove NEW	glove	Wilson	baseball	NEW	11 3/4"							A0700		1782-BST
Miken MS1234SP Super Soft Slowpitch 12.75" Glove RHT	Glove	Miken	Slowpitch		12.75"	RHT								MS1234SP			Super Soft
Mizuno Ballpark Baseball Glove Professional Model MMX131 Max Flex Leather	Glove	Mizuno Ballpark	Baseball											MMX131		Max Flex Leather
Rawlings PRO302-6SC - Heart of the Hide 12.75 inch Baseball Glove Right Hand Thr	Glove	Rawlings	Baseball		12.75 inch	Right Hand Thr						Heart of the Hide		PRO302-6SC
Worth LACMB Liberty Advanced Catcher's Glove - RHT	Glove	Worth LACMB				RHT	Catcher's							Liberty Advanced
PROS20BR RAWLINGS PRO PREFERED 12 IN RHT NEW!!!		RAWLINGS		NEW	12 IN	RHT						Pro Preferred		PROS20BR
TPX Baseball Gloves 12,5'' Black { RHT }" FIRST "	Gloves		Baseball		12,5''	RHT	FIRST					TPX	Black
Rawlings FP125 Fast Pitch Softball Glove 12.5" RH	Glove	Rawlings	Fast Pitch Softball		12.5"	RH								FP125
Easton NE13FP Natural Elite Fastpitch (13") - LHT		Easton	Fastpitch		13"	LHT						Natural Elite		NE13FP
Miken Super Soft SP Softball Fielding Glove RHT 13.5"	Glove	Miken	Softball		13.5"	RHT	Fielding							Super Soft SP
Rico Petrocelli Baseball Glove 42-377 Youth Size: 10"	Glove	Rico Petrocelli	Baseball		10"				Youth					42-377
Spalding SC4-B Competition Series 12.5" Softball Baseball Glove	Glove	Spalding	Softball Baseball		12.5"							Competition Series		SC4-B
NEW RAWLINGS Playmaker Serie PM120BT Baseball/Softball Glove 12" Right Handed	Glove	RAWLINGS	Baseball/Softball	NEW	12"	Right Handed						Playmaker Serie		PM120BT
RAWLINGS BASEBALL GLOVE GLD LEGEND 11.5	GLOVE	RAWLINGS	BASEBALL		11.5									GLD LEGEND
Louisville Slugger HBG40 ( 10.5 Inch)		Louisville Slugger			10.5 Inch									HBG40
Easton Synergy SYFP1200 12 Inch Womens Fastpitch Softball Glove Right Hand Throw	Glove	Easton	Fastpitch Softball		12 Inch	Right Hand Throw		Womens				Synergy		SYFP1200
New Mizuno MVP Prime 11.25" Baseball Glove GMVP1126P	Glove	Mizuno	Baseball	New	11.25"							MVP Prime		GMVP1126P
Rawlings Gold Glove Fastpitch Catchers Mitt GGCMFPB LH	Mitt	Rawlings	Fastpitch			LH	Catchers					Gold Glove		GGCMFPB
franklin 12.5 inch glove all leather worn-in	glove	franklin		worn-in	12.5 inch											all leather
MIZUNO GSP1403 SUPREME SERIES 14" UTILITY SOFTBALL FIELDERS GLOVE NEW WITH TAGS!	GLOVE	MIZUNO	UTILITY SOFTBALL	NEW	14"		FIELDERS					SUPREME SERIES		GSP1403
RAWLINGS BASEBALL GLOVE DEREK JETER RBG 36 DJ 9 1/2 INCH	GLOVE	RAWLINGS	BASEBALL		9 1/2 INCH									RBG 36 DJ
Vtg. NATIONAL Top Grain Baseball Fielders Glove LHT 9 inch Little League Lefty	Glove	Vtg. NATIONAL	Baseball		9 inch	LHT	Fielders		Little League							Top Grain
RAWLINGS RBG70 RIGHT HANDED SIGNATURE SERIES " TOM SEAVER " GLOVE	GLOVE	RAWLINGS				RIGHT HANDED						SIGNATURE SERIES		RBG70
13.5" Cooper Diamond C #758 outfielder's glove	glove	Cooper Diamond			13.5"		outfielder's							#758
SSK Baseball Gloves 12.5'' Red {Special Order} RHT	Gloves	SSK	Baseball		12.5''	RHT							Red
Vintage RAWLINGS Lance Parrish Catchers Glove Mitt 10"	Glove Mitt	Vintage RAWLINGS			10"		Catchers							Lance Parrish
2012 LOUISVILLE TPX PRO FLARE FL1175CC GLOVE 11.75" RH $219.99	GLOVE	LOUISVILLE			11.75"	RH					219.99	TPX PRO		FL1175CC
NW Rawlings Leather Baseball Softball Glove Playmaker12" Right Hand Throw PM120T	Glove	Rawlings	Baseball Softball	NW	12"	Right Hand Throw						Playmaker		PM120T		Leather
New Wilson Glove A3000 EXO 1955 NWT	Glove	Wilson		New:::NWT								A3000		EXO 1955
Insignia fastpitch softball glove 12 1/2 " (made in USA) retails $200 nokona	glove	Insignia	fastpitch softball		12 1/2 "						200
Mizuno MVP Prime FP Softball Glove GMVP1258P 12.5" RHT	Glove	Mizuno	FP Softball		12.5"	RHT						MVP Prime		GMVP1258P
BL-1250H-BLK NOKONA BLOODLINE BLACK PRO ELITE 12 1/2 INCH BASEBALL 1ST BASE MITT	MITT	NOKONA			12 1/2 INCH		1ST BASE					BLOODLINE	BLACK	BL-1250H-BLK
SSK Super Founder 11.5" Fielder Baseball Glove Tan Pro RHT	Glove	SSK	Baseball		11.5"	RHT	Fielder						Tan	Super Founder
Mac Gregor BBFSPROX RTH Fielders Softball Glove	Glove	Mac Gregor	Softball			RTH	Fielders							BBFSPROX
MIZUNO MVP PRIME GXC56 CATCHERS MITT RHT	MITT	MIZUNO				RHT	CATCHERS					MVP PRIME		GXC56
Louisville Slugger Genesis Youth Baseball Glove GENB1000 10 inch RHT NEW	Glove	Louisville Slugger	Youth Baseball	NEW	10 inch	RHT			Youth			Genesis		GENB1000
Mizuno Prospect Series GPL1102 11" LEFT w/ FREE STEAM Baseball Glove	Glove	Mizuno	Baseball		11"	LEFT						Prospect Series		GPL1102
RAWLINGS PRO SHOP PRO PREFERRED 12.25" FIELDERS GLOVE PRO1000-6KOT RHT ID 16	GLOVE	RAWLINGS			12.25"	RHT	FIELDERS					PRO SHOP PRO PREFERRED		PRO1000-6KOT
Wilson A2K BBGDW5GM 12" NWOT Made in Japan Tags/Keychain included		Wilson			12"							A2K		BBGDW5GM			Made in Japan
Vintage WILSON A2000 "The A2000" XLC Baseball Glove Softball RH THROW NO RESERVE	Glove	Vintage WILSON	Baseball:::Softball			RH THROW						A2000		XLC
Rawlings PP12MTC Leather Black Player Preffed Glove New 12	Glove	Rawlings		New	12							Player Preffed	Black	PP12MTC		Leather
Rawlings RMP30 Baseball Glove	Glove	Rawlings	Baseball											RMP30
Rawlings R140 Renegade (14") - RHT		Rawlings			14"	RHT						Renegade		R140
Mizuno GCF1251 Classic Fastpitch (12") - RHT		Mizuno	Fastpitch		12"	RHT						Classic		GCF1251
ZETT Baseball Gloves Black 12.25'' { Kip } RHT	Gloves	ZETT	Baseball		12.25''	RHT							Black
Wilson Youth Baseball glove, 10.5", Barry Bonds Advisory Staff A2275, nice	glove	Wilson	Youth Baseball	nice	10.5"				Youth			Barry Bonds Advisory Staff		A2275
EASTON PPK151BT LHT 11.75 PREMIER PRO KIP BASEBALL GLOVE LEFTY	GLOVE	EASTON	BASEBALL		11.75	LHT:::LEFTY						PREMIER PRO KIP		PPK151BT
RAWLINGS PRO SERIES SPECIAL EDITION 11.75" FIELDERS GLOVE RPS175B RHT	Glove	RAWLINGS			11.75"	RHT	FIELDERS					PRO SERIES SPECIAL EDITION		RPS175B
10911F4 Neo Classic II Adult-Pearl-Black-White		Neo Classic II							Adult				Pearl-Black-White	10911F4
Rawlings 5SC120CD-RH - REVO SOLID CORE 550 Series 12 Fast Pitch Left Hand Softba		Rawlings	Fast Pitch:::Softba		12	Left Hand						REVO SOLID CORE 550 Series		5SC120CD-RH
RAWLINGS JOE MAUER AUTOGRAPH 33" CIRCUMFERENCE CATCHERS MITT RCM30T RHT	MITT	RAWLINGS			33"	RHT	CATCHERS							RCM30T
Franklin Baseball Glove Deluxe Relacing Repair Kit	Glove	Franklin	Baseball
Rawlings Gold Glove Gamer 11.25 Inch GG1125G Baseball Glove	Glove	Rawlings	Baseball		11.25 Inch							Gold Glove Gamer		GG1125G
Wilson Pro Stock A2K 2800 W 12" first base mitt baseball glove NEW	mitt:::glove	Wilson	baseball	NEW	12"		first base					Pro Stock A2K		2800
Rawlings 32" Mike Piazza Pro Game Ready Leather Baseball Catchers glove mitt	glove mitt	Rawlings	Baseball		32"		Catchers							Mike Piazza Pro Game Ready		Leather
Easton BX1250B Baseball Glove (12.5-Inch) Right or Left	Glove	Easton	Baseball		12.5-Inch	Right or Left								BX1250B
RAWLINGS 13INCH SOFTBALL GLOVE RIGHT HANDED SG76 NWT GOLD GLOVE SOFTBALL MIT	GLOVE:::MIT	RAWLINGS	SOFTBALL	NWT	13INCH	RIGHT HANDED								SG76
2012 Easton Rival Rd/Hm Adult Batting Gloves MD RED	Batting Gloves	Easton							Adult				RED	Rival Rd/Hm
Rawlings pros27tbr pro preferred baseball glove lefty	glove	Rawlings	baseball			lefty						Pro preferred		pros27tbr
10 Easton STX115 Stealth Speed Adult BB Glove 11.5"	Glove	Easton	BB		11.5"							Stealth Speed		STX115
Mizuno MVP Series GMVP1401 14" Softball Glove	Glove	Mizuno	Softball		14"							MVP Series		GMVP1401
Left handed Mizuno baseball glove, Professional model-MT 1500.used	glove	Mizuno	baseball	used		Left handed								MT 1500
NEW MODEL! Pair Palmgard STS Padded Protective Batting Glove Baseball YOUTH XL	Batting Glove	Palmgard	Baseball	NEW	XL				Youth
MIZUNO SUPREME SERIES GSP1300T SLOW PITCH SOFTBALL -NEW		MIZUNO	SLOW PITCH SOFTBALL	NEW								SUPREME SERIES		GSP1300T
Rawlings Revo Solid Core 750 7SC115CF 11.5" Baseball Glove	Glove	Rawlings	Baseball		11.5"							Revo Solid Core 750		7SC115CF
MIZUNO MVP FASTPITCH GMVP1308 FASTPITCH GLOVE 13" RIGHTY REG $100	GLOVE	MIZUNO	FASTPITCH		13"	RIGHTY					REG $100	MVP		GMVP1308
Rawlings SB120FP Silverback (12") - LHT		Rawlings			12"	LHT						Silverback		SB120FP
Louisville Genesis Youth Baseball Glove Mitt 9.5" LHT	Glove Mitt	Louisville	Youth Baseball		9.5"	LHT			Youth			Genesis
AKADEMA ATS 77 12.5inch REPTILIAN		AKADEMA			12.5inch							ATS 77		REPTILIAN
SHOELESS JOE 26 INCH FIRST BASE GLOVE - SHOELESS JOE BASEBALL GLOVE - LEFT HAND	GLOVE	SHOELESS JOE	Baseball		26 INCH	LEFT HAND	FIRST BASE
Mizuno GMVP1203 MVP Series Pitcher Pattern Baseball Glove 12 inch LEFTY	Glove	Mizuno	Baseball		12 inch	LEFTY	Pitcher					MVP Series		GMVP1203
Louisville Slugger Zephyr Z1301 13" fastpitch softball glove NEW RHT	glove	Louisville Slugger	fastpitch softball	NEW	13"	RHT						Zephyr		Z1301
