# Supplementary material
Source: ML conference proceedings conference paper supplement (https://aclanthology.org/D12-1099)
Supplement: Attachment [file gs-annotator2.xlsx]

## Sheet: TV
	TV_Projector_type	screen_size	condition	display_technology	brand	resolution	3D	shipping_info	Seller	Price	Connectivity	App	Refresh_Rate	Series_name	Color	Model_name	Discount	Offer_period	Special_offer_bundles	Others
42" 3D LED TV and 3D Blu-ray entertainment bundle $680 FS @ Newegg	TV	42"		LED			3D	FS	Newegg	680
ExpiredNew TCL 40" LCD 1080p for 270.		40"	New	LCD	TCL	1080p				270								expired
Sharp LC32SV29U 32-Inch 720p LCD HDTV - Black for $249.99 w/ FS @amazon	HDTV	32-Inch		LCD	Sharp	720p		FS	amazon	249.99					Black	LC32SV29U
iSymphony 32" 720p LCD TV w/ Netflix, VUDU for $299 (for now) + free shipping @ Amazon	TV	32"		LCD	iSymphony	720p		free shipping	Amazon	299		Netflix:::VUDU
ExpiredSceptre 42" 1080p LED-LCD HDTV E420BV-F120 $349 FS from Newegg	HDTV	42"		LED-LCD	Sceptre	1080p		FS	Newegg	349						E420BV-F120		expired
AVF EL801B-A Adjustable Tilt TV Mount for 30-Inch to 65-Inch Screens (Black) $19.99 sss eligible @ amazon	TV Mount	30-inch to 65-inch							amazon	19.99					black	AFV EL801B-A
Supernatural: The Complete Seasons 1-6 (DVD) (Each Season Sold Separately) w/FSSS $12.99 @ Amazon
Toshiba 42-inch 1080p 240Hz LED-LCD HDTV 42TL515U $679.99 Shipped	HDTV	42-inch		LED-LCD	Toshiba	1080p		Shipped		679.99			240Hz			42TL515U
New LG 55LE5500 55" LED-edgelit w/local dimming 120Hz HDTV with Smartcast, $949 shipped @buy.com through eBay	HDTV	55"	New	LED	LG			shipped	buy.com through eBay	949		Smartcast	120Hz			55LE5500				edgelit w/local dimming
Samsung 55" 120Hz 3D 1080p LED LCD HDTV for $1,399 + free shipping @ Amazon	HDTV	55"		LED LCD	Samsung	1080p	3D	free shipping	Amazon	1399			120Hz
Toshiba 46SL417U 46-Inch 1080p 120 Hz LED-LCD HDTV with Net TV for $599 at Menards in-store only	HDTV	46-Inch		LED-LCD	Toshiba	1080p		in-store only	Menards	599		Net TV	120 Hz			46SL417U
LG 60PV250 60-inch 1080p 600Hz Plasma HDTV $799.99 Shipped	HDTV	60-inch		Plasma	LG	1080p		Shipped		799.99			600Hz			60PV250
Ebates November Double Cashback Promo
Element 32" 1080p LED-Backlit LCD HDTV from $250 + free shipping	HDTV	32"		LED-Backlit LCD	Element	1080p		free shipping		250
Sansui SLED1928 19-inch SLED1928 LED HDTV $129.99 Shipped	HDTV	19-inch		LED	Sansui			Shipped		129.99						SLED1928
ExpiredSceptre 32" Class (31.5" Diag.) 720p LCD HDTV X320BV-HD $188 + FS @ Newegg	HDTV	31.5"		LCD	Sceptre	720p		FS	Newegg	188						X320BV-HD		expired
Toshiba 40" 1080p LCD HDTV for $380 + free shipping @ Best Buy	HDTV	40"		LCD	Toshiba	1080p		free shipping	Best Buy	380
Sceptre E243CV-FHD 23-inch LED 1080p 60Hz HDTV Ultra Slim Gun Metal $159.98 Free Shipping to Store - Walmart	HDTV	23-inch		LED	Sceptre	1080p		Free Shipping to Store	Walmart	159.98			60Hz		Gun Metal	E243CV
Zenith 50" 600Hz 720p Plasma HDTV for $500 + pickup at Sears	HDTV	50"		Plasma	Zenith	720p		pickup	Sears	500			600Hz
ExpiredLG 50" 1080P 3D Plasma with internet 50PZ550 with 2 pair of glasses at Amazon for $769		50"		Plasma	LG	1080P	3D		Amazon	769	with internet					50PZ550		expired		2 pairs glasses
ExpiredAuria 32" 1080p 60Hz LED-LCD HDTV EQ3266L 179.99 FS @ newegg	HDTV	32"		LED-LCD	Auria	1080p		FS	newegg	179.99			60Hz			EQ3266L		expired
LG 60PV450 60" 2D Plasma $935.95 AC @ Newegg		60"		Plasma	LG		2D		Newegg	935.95						60PV450
ExpiredSony BRAVIA KDL46HX820 46-inch 1080P 240Hz 3D LED Backlit HDTV $999.99	HDTV	46-inch		LED	Sony	1080P	3D			999.99			240Hz	BRAVIA		KDL46HX820
ExpiredPanasonic - 32" Class / LED / 1080p / 60Hz / HDTV - TC-L32E3 - $379.99 Shipped @ Best Buy	HDTV	32"		LED	Panasonic	1080p		Shipped	Best Buy	379.99			60Hz			TC-L32E3
Panasonic VIERA TC-P50S30 50-Inch 1080p Plasma HDTV $599 - Amazon	HDTV	50-Inch		Plasma	Panasonic	1080p			Amazon	599				VIERA		TC-P50S30
Sylvania LC190SS2 19-inch Class 720p 60hz LCD HDTV Black $89.99 Shipped	HDTV	19-inch		LCD	Sylvania	720p		Shipped		89.99			60hz		Black	LC190SS2
Hauppauge WinTV DCR-2650 Dual Tuner Digital Cable Card Receiver $99.99 AR at J&amp;R	WinTV				Hauppauge				J&R							DCR-2650
Mitsubishi Cinema WD-82740 82" 3D DLP Projection HDTV 1080p 120Hz - $1699 @ Buy.com & sold by Pauls TV (free ship)	Projection HDTV	82"		DLP	Mitsubishi	1080p	3D	free ship	Buy.com & sold by Pauls TV	1699			120Hz	Cinema		WD-82740
Sharp 32" 720p Widescreen LCD HDTV for $250 + free shipping	HDTV	32"		Widescreen LCD	Sharp	720p		free shipping		250
LG 42LV4400 42-Inch 1080p 120Hz LED HDTV - $499 FSSS @Amazon.com	HDTV	42-Inch		LED	LG	1080p		FSSS	Amazon.com	499			120Hz			42LV4400
Sony BRAVIA Z Series KDL-52Z5100 52-inch 240Hz 1080p HDTV Refurb $899.99 Shipped - Sony Store	HDTV	52-inch	Refurb		Sony	1080p		Shipped	Sony Store	899.99			240Hz	BRAVIA Z Series		KDL-52Z5100
42" Panasonic plasma $388 at ABC Warehouse (in-store only)		42"		plasma	Panasonic			in-store only	ABC Warehouse	388
Haier HLC24XSL2 24-Inch Ultra Slim 1080p LED LCD HDTV With Built In DVD Player - Black $249	HDTV	24-Inch		LED LCD	Haier	1080p				249					Black	HLC24XSL2			Built in DVD player
ExpiredLG 47" 120Hz 1080p 3D LED LCD HDTV Blu-ray Bundle for $800 + free shipping	HDTV	47"		LED LCD	LG	1080p	3D	free shipping		800			120Hz					expired	Blu-ray Bundle
Save: $4,700.00 Samsung 55" LED		55"		LED	Samsung												4700
Samsung 46" 1080p LCD HDTV for $598 + free shipping @ Walmart	HDTV	46"		LCD	Samsung	1080p		free shipping	Walmart	598
LG 32-Inch 32LK450 1080p 60Hz LCD HDTV @ Amazon - $299.99 Shipped	HDTV	32-Inch		LCD	LG	1080p		Shipped	Amazon	299.99			60Hz			32LK450
Samsung UN55D7000 55" 1080p 240hz 3D LED LCD HDTV $1700 at Pauls TV + FS	HDTV	55"		LED LCD	Samsung	1080p	3D	FS	Pauls TV	1700			240hz			UN55D7000
Discover Card $100 OFF HDTVs from Amazon	HDTVs				Discover Card				Amazon								$100 OFF
Panasonic TC-P50S30 50" 1080P Plasma for $698 at Sears		50"		Plasma	Panasonic	1080P			Sears	698						TC-P50S30
Dynex&trade; - 55" Class / LCD / 1080p / 120Hz / HDTV $599.99 With FS	HDTV	55"		LCD	Dynex	1080p		With FS		599.99			120Hz
Viore 32-inch Class LCD 720p 60Hz, Internet-Connected HDTV LC32VH60CN $249.98 Free Ship to Store - Walmart	HDTV	32-inch		LCD	Viore	720p		Free Ship to Store	Walmart	249.98	Internet-Connected		60Hz			LC32VH60CN
LG - 42" LED / 1080p / 120Hz / 3D + Blu-ray player + 4 glasses $699.99 @ Best Buy B&amp;M	HDTV	42"		LED	LG	1080p	3D		Best Buy	699.99			120Hz						Blu-ray player + 4 glasses
ExpiredTCL L40FHDF12TA 40-Inch 1080p 60 Hz LCD HDTV $319.99 @Amazon	HDTV	40-Inch		LCD	TCL	1080p			Amazon	319.99			60 Hz			L40FHDF12TA		expired
ExpiredLG Infinia 60PZ950 60-Inch 1080p 600 Hz 3D Plasma HDTV with TruBlack Filter and Smart TV $1339.44 Shipped	HDTV	60-Inch		Plasma	LG	1080p	3D	Shipped		1339.44		Smart TV	600 Hz	Infinia		60PZ950		expired
Element 40" 120Hz 1080p LED LCD HDTV for $399 + free shipping	HDTV	40"		LED LCD	Element	1080p		free shipping		399			120Hz
Dynex DX-24LD230A12 24-inch Class 1080p 60Hz LCD HDTV DVD $199.99 Shipped	HDTV	24-inch		LCD	Dynex	1080p		Shipped		199.99			60Hz			DX-24LD230A12
ExpiredInsignia 24-inch Class LED 1080p 60Hz HDTV NS-24E730A12 $169.99 Free In-Store Pickup	HDTV	24-inch		LED	Insignia	1080p		Free In-Store Pickup		169.99			60Hz			NS-24E730A12		expired
Panasonic TC-P46X3 Plasma TV $399.99 at Bestbuy	TV			Plasma	Panasonic				Bestbuy	399.99						TC-P46X3
LG 55LE5500 55" 1080p 120Hz LED LCD HDTV $1100 at Buy.com + FS	HDTV	55"		LED LCD	LG	1080p		FS	Buy.com	1100			120Hz			55LE5500
Westinghouse 55" 120Hz 1080p LCD HDTV for $580 + pickup at Target	HDTV	55"		LCD	Westinghouse	1080p		pickup	Target	580			120Hz
Viore 19-inch Class LCD 720p 60Hz TV/DVD Combo, LCD19VH56 $139.98 Shipped	TV	19-inch		LCD	Viore	720p		Shipped		139.98			60Hz			LCD19VH56			DVD combo
ExpiredPanasonic TC-P65VT30 - $2599.99 at World Wide Stereo + 3% Cash Back					Panasonic				World Wide Stereo	2599.99						TC-P65VT30	3% Cash Back	expired
Samsung UN46C9000 46-inch 240Hz 3D LED Ultra Slim HDTV $1499.99 Shipped	HDTV	46-inch		LED	Samsung		3D	Shipped		1499.99			240Hz			UN46C9000
Mitsubishi Mobile WXGA DLP Projector $339.99 Shipped - Bestbuy	Projector			DLP	Mitsubishi Mobile			Shipped	Bestbuy	339.99						WXGA
LG AG-F210 3D Cinema Series Glasses 2 Pack $9.99 Shipped Buydig					LG		3D	Shipped	Buydig	9.99				Cinema Series		AG-F210
Element 37" 1080p 60hz Widescreen LCD HDTV for $299 + free shipping	HDTV	37"		Widescreen LCD	Element	1080p		free shipping		299			60hz
Seiki 32-inch LCD HDTV SC323FI $194.99 Free In Store Pickup - Sears	HDTV	32-inch		LCD	Seiki			Free In Store Pickup	Sears	194.99						SC323FI
LG 55LW5600 now $1099 (+ $10 and tax) at fry's p/u only					LG			p/u only	fry's	$1099 (+ $10 and tax)						55LW5600
Insignia NS46E790A12 46-inch 1080p 120Hz LED HDTV $629.99 Free In Store Pickup - Bestbuy	HDTV	46-inch		LED	Insignia	1080p		Free In Store Pickup	Bestbuy	629.99			120Hz			NS46E790A12
ExpiredMitsubishi Cinema WD-82740 82-inch 1080p 120 Hz 3D DLP Projection TV $1999.99 Shipped	Projection TV	82-inch		DLP	Mitsubishi	1080p	3D	Shipped		1999.99			120 Hz	Cinema		WD-82740		expired
Samsung UN22C4000 22-inch Class 720p 60Hz LED LCD HDTV Black $219.99 Shipped	HDTV	22-inch		LED LCD	Samsung	720p		Shipped		219.99			60Hz		Black	UN22C4000
Panasonic 65" 1080p 3D THX-Certified Plasma HDTV for $2,497 + free shipping @ US Appliance	HDTV	65"		Plasma	Panasonic	1080p	3D	free shipping	US Appliance	2497										THX-Certified
VIZIO VF551XVT 55" LED Backlit LCD HDTV ($900)	HDTV	55"		LED Backlit LCD	VIZIO					900						VF551XVT
Haier 42" 1080p LED-Backlit LCD HDTV for $399 + pickup at Fry's	HDTV	42"		LED-Backlit LCD	Haier	1080p		pickup	Fry's	399
Toshiba 32" 720p Widescreen LCD HDTV for $250 + free shipping	HDTV	32"		Widescreen LCD	Toshiba	720p		free shipping		250
ExpiredAmazon Samsung UN46D6000 46-Inch 1080p 120Hz LED HDTV $909.99	HDTV	46-Inch		LED	Samsung	1080p			Amazon	909.99			120Hz			UN46D6000		expired
ExpiredRCA 42" Plasma TV $329 today only at Best Buy.	TV	42"		Plasma	RCA				Best Buy	329								today only
Sceptre X405BV-FHD 40-inch 1080p 60Hz LCD HDTV $319.98 Shipped	HDTV	40-inch		LCD	Sceptre	1080p		Shipped		319.98			60Hz			X405BV-FHD
LG 42" 120Hz 1080p LED-Backlit LCD HDTV for $499 + free shipping @ Walmart	HDTV	42"		LED-Backlit LCD	LG	1080p		free shipping	Walmart	499			120Hz
Samsung UN26D4003 26-inch 60Hz 720p Class LED HDTV $299.99 Free in store pickup	HDTV	26-inch		LED	Samsung	720p		Free in store pickup		299.99			60Hz			UN26D4003
TCL 24-Inch 1080p LED HDTV $199.99 Shipped at Amazon	HDTV	24-Inch		LED	TCL	1080p		Shipped	Amazon	199.99
Sony BRAVIA KDL40EX720 40-Inch 1080p 3D ready LED HDTV Refurb $609.99 Shipped	HDTV	40-Inch	Refurb	LED	Sony	1080p	3D	Shipped		609.99				BRAVIA		KDL40EX720
ExpiredSceptre X405BV-FHD 40-inch 1080p 60Hz LCD HDTV $299.98 Free In Store Pickup Walmart	HDTV	40-inch		LCD	Sceptre	1080p		Free In Store Pickup	Walmart	299.98			60Hz			X405BV-FHD
Sharp AQUOS 60" 1080p 120hz Widescreen LCD HDTV for $1,000 + free shipping	HDTV	60"		Widescreen LCD	Sharp	1080p		free shipping		1000			120hz	AQUOS		AQUOS
Frys-LG 55LW6500 $1400+Tax Store Pickup					LG			Store Pickup	Frys	$1400+Tax						55LW6500
Official Office Depot Coupon Thread
Sharp 70" LED HDTV LC-70LE632U $1899 @ Costco B&amp;M through 11/28	HDTV	70"		LED	Sharp				Costco	1899						LC-70LE632U		through 11/28
40" Element 1080p LCD HDTV $243.80 at Target (with RedCard and Ebates)	HDTV	40"		LCD	Element	1080p			Target	243.8								Last Call Sale
ExpiredVizio Last Call Sale: 37" 1080p LCD HDTV for $314 + free shipping, more	HDTV	37"		LCD	Vizio	1080p		free shipping		314								expired
Apple TV digital media receiver $84.99 with FREE shipping	TV				Apple			FREE shipping		84.99
LG 55LW5600 55" 3D LED-edgelit HDTV w/local dimming, 120Hz, 4 pairs 3D glasses, WiFi, Smart TV, $1,259 shipped @newegg	HDTV	55"		LED-edgelit	LG		3D	shipped	newegg	1259	WiFi	Smart TV	120Hz			55LW5600			4 pairs 3D glasses
Sony NSX-32GT1 32-Inch 1080p 60 Hz Google TV, Black for $393.00 @ AMAZON		32-Inch			Sony	1080p			AMAZON	393		Google TV	60 Hz		Black	NSX-32GT1
ExpiredLG Electronics 42" 1080p LCD HDTV - 42LK450 at ecost.com for $338.98	HDTV	42"		LCD	LG Electronics	1080p			ecost.com	338.98						42LK450		expired
Samsung 55" 120Hz 3D 1080p LED-Backlit LCD HDTV for $1,399 + pickup at Fry's	HDTV	55"		LED-Backlit LCD	Samsung	1080p	3D	pickup	Fry's	1399			120Hz
Samsung UN60D7000 60" 1080p 3D LED LCD HDTV $2337.99 FS @amazon.com	HDTV	60"		LED LCD	Samsung	1080p	3D	FS	amazon.com	2337.99						UN60D7000
Samsung UN46D7000 46-inch 240Hz 3D LED HDTV + 3D Blu-ray Player + 3D Glasses Bundle $1199.99	HDTV	46-inch		LED	Samsung		3D			1199.99			240Hz			UN46D7000			Blu-ray Player + 3D Glasses Bundle
Samsung 64" 600Hz 1080p 3D Plasma HDTV for $1,699 + free shipping	HDTV	64"		Plasma	Samsung	1080p	3D	free shipping		1699			600Hz
Coby LEDTV3226 32-inch LED 720p HDTV $248.97 Shipped	HDTV	32-inch		LED	Coby	720p		Shipped		248.97						LEDTV3226
Rosewill Black Ultra Slim Low Profile 37" to 65" LCD LED Flat-Panel TV Wall Mount $14.99 ac / fs @ newegg	TV Wall Mount	37" to 65"		LCD LED Flat-Panel	Rosewill			fs	newegg	14.99					Black
Sharp LC-70LE632U AQUOS 70" Class 1080p 120Hz LED LCD HDTV » only $1999.99 @ Bestbuy.com + FS	HDTV	70"		LED LCD	Sharp	1080p		FS	Bestbuy.com	1999.99			120Hz	AQUOS		LC-70LE632U
Samsung Series 4 51-inch PN51D450 720p Plasma HDTV + Free $100 eGift Card $597.99 Dell	HDTV	51-inch		Plasma	Samsung	720p			Dell	597.99				Series 4		PN51D450			Free $100 eGift Card
ExpiredNEW TARGET B&amp;M GC OFFER! $10 Target GiftCard w/ purchase of $50 with coupon exp 12/10
Samsung UN55C9000 55-inch LED 1080p 240Hz 3D HDTV $1599.86 Shipped Bestbuy	HDTV	55-inch		LED	Samsung	1080p	3D	Shipped	Bestbuy	1599.86			240Hz			UN55C9000
RCA 50PA30RQ 50-inch 720p 600Hz Plasma HDTV $499.99 Shipped Bestbuy	HDTV	50-inch		Plasma	RCA	720p		Shipped	Bestbuy	499.99			600Hz			50PA30RQ
Zenith 50" 600Hz 1080p Plasma HDTV for $550 + pickup at Sears	HDTV	50"		Plasma	Zenith	1080p		pickup	Sears	550			600Hz
Samsung PN59D7000 59-inch 1080p 600Hz 3D Plasma HDTV + Samsung Blu-ray Player + 4 Pairs of 3D Glasses $1749.99 Shipped	HDTV	59-inch		Plasma	Samsung	1080p	3D	shipped		1749.99			600Hz			PN59D7000			Samsung Blu-ray Player + 4 Pairs of 3D Glasses
ExpiredDynex 46" 1080p LCD HDTV for $400 + free shipping or pickup for Christmas @ Best Buy	HDTV	46"		LCD	Dynex	1080p		free shipping or pickup	Best Buy	400								expired
ExpiredSony BRAVIA KDL32BX320 32-Inch 720p LCD HDTV @amazon $298 shipped	HDTV	32-Inch		LCD	Sony	720p		shipped	amazon	298				BRAVIA		KDL32BX320		expired
Atdec Visidec VF-AT-D Focus LCD Double Swing Arm 18 lb - Polished Silver $99.99 fs @ buy.com				LCD	Atdec Visidec			fs	buy.com	99.99				Visidec		VF-AT-D
